# Supplementary material for: Redox reactions of a RuIII-edta complex with thioamino acids. Kinetic and mechanistic studies
Source: Royal Society of Chemistry journal article supplement (doi:10.1039/c0dt01444c), 2011-01-01
Supplement: c0dt01444c.pdf [file c0dt01444c.pdf]

## Electronic Supplementary Information

### Redox reactions of a Ru<sup>III</sup>-edta complex with thioamino acids. Kinetic and mechanistic studies

Debabrata Chatterjee,\* Ujjwal Pal, Sarita Ghosh and Rudi van Eldik\*

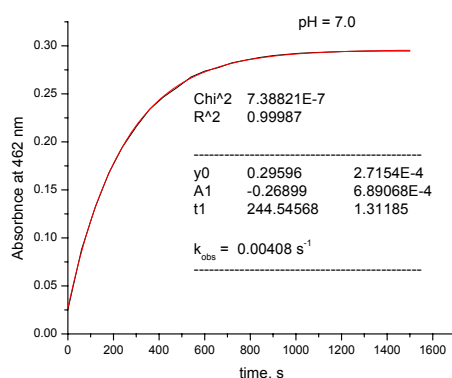

**Figure S1.** Kinetic traces at different pH for reduction of [Ru<sup>III</sup>(edta)(pz)]<sup>-</sup> by cysteine (CySH). [Ru<sup>III</sup>] = 1 × 10<sup>-4</sup> M, [CySH] = 1 × 10<sup>-3</sup> M, T = 21 °C. Black line – experimental trace; red line – single-exponential fit.

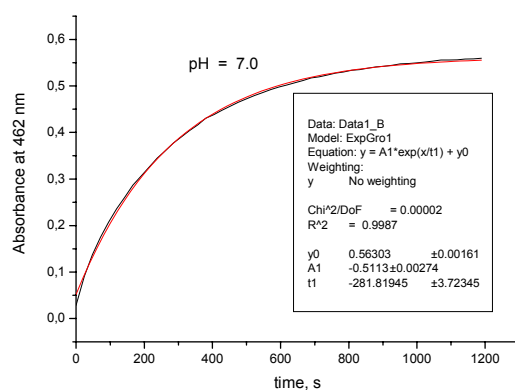

**Figure S2.** Kinetic traces at different pH for reduction of [Ru<sup>III</sup>(edta)(pz)]<sup>-</sup> by glutathione (GSH). [Ru<sup>III</sup>] = 1 × 10<sup>-4</sup> M, [GSH] = 1 × 10<sup>-3</sup> M, T = 21 °C. Black line – experimental trace; red line – single-exponential fit.

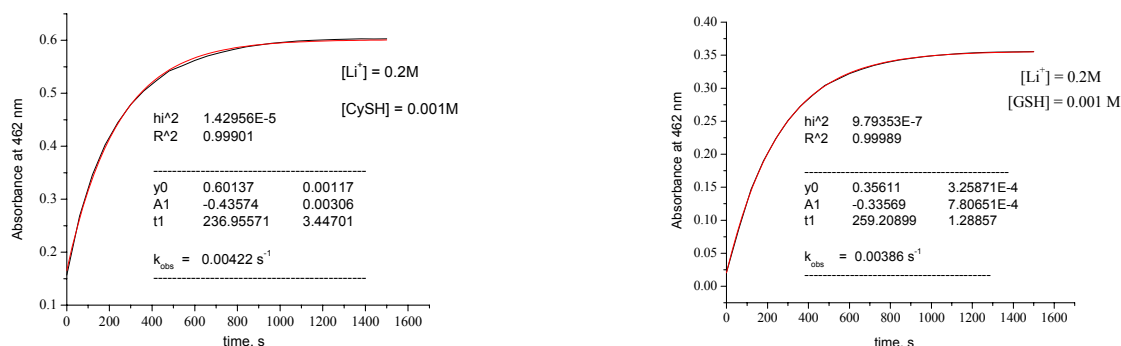

**Figure S3.** Kinetic traces for reduction of  $[\text{Ru}^{\text{III}}(\text{edta})(\text{pz})]^-$  by RSH in the presence of various alkali cations.  $[\text{Ru}^{\text{III}}] = 1 \times 10^{-4}\text{ M}$ ,  $[\text{RSH}] = 1 \times 10^{-3}\text{ M}$ ,  $T = 21\text{ }^\circ\text{C}$ ,  $\text{pH} = 5.0$  (1mM acetate buffer). Black line – experimental trace; red line – single-exponential fit.

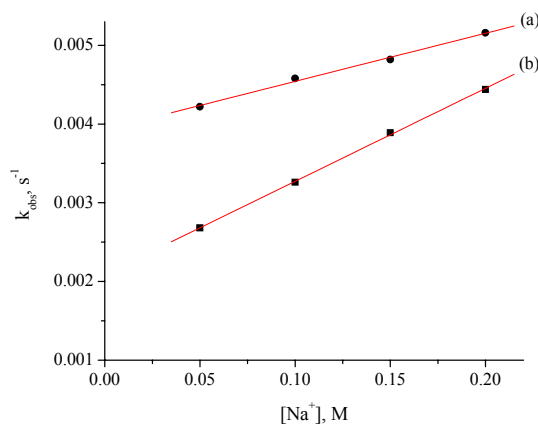

**Figure S4.** Plots of  $k_{\text{obs}}$  versus  $[\text{Na}^+]$  for the reduction of  $[\text{Ru}^{\text{III}}(\text{edta})(\text{pz})]^-$  by (a) cysteine and (b) glutathione  $[\text{Ru}^{\text{III}}] = 1 \times 10^{-4}\text{ M}$ ,  $[\text{GSH}] = 1 \times 10^{-3}\text{ M}$ ,  $T = 21\text{ }^\circ\text{C}$ ,  $\text{pH} = 5.0$  (1mM acetate buffer).

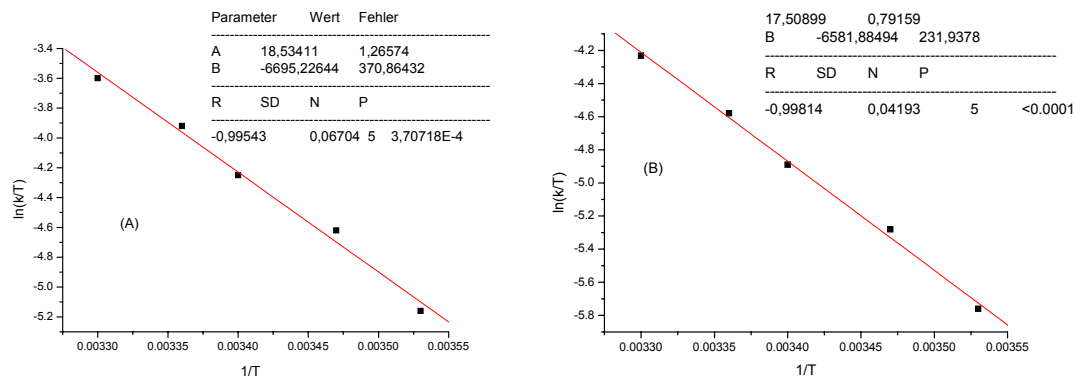

**Figure S5.** Eyring plots for reduction of  $[\text{Ru}^{\text{III}}(\text{edta})(\text{pz})]^-$  with (a) cysteine and (b) glutathione

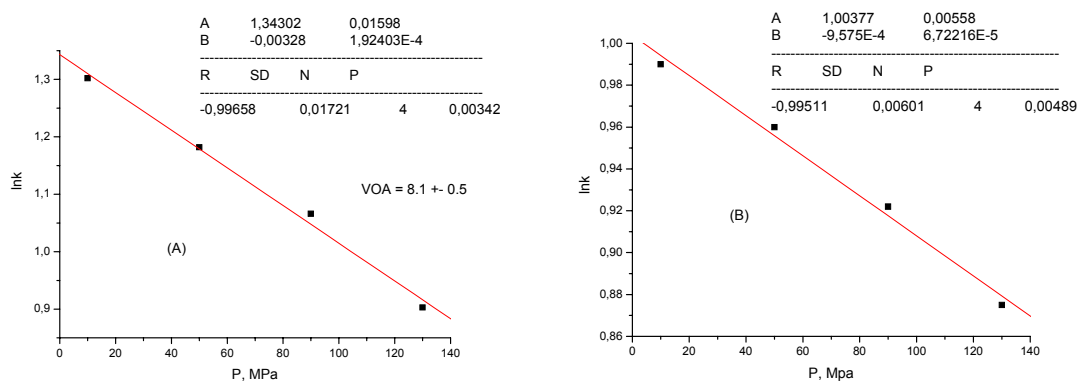

**Figure S6.** Plots of  $\ln k$  versus pressure for reduction of  $[\text{Ru}^{\text{III}}(\text{edta})(\text{pz})]^-$  by (A) cysteine and (B) glutathione
